# Supplementary material
Source: PubMed Central journal article supplement (PMC6832057)

*Supplemental material is neither peer-reviewed nor thoroughly edited by CJASN. The authors alone are responsible for the accuracy and presentation of the material.*

## **Supplemental Materials**

### **Associations of opioid prescriptions with death and hospitalization across the spectrum of estimated GFR**

Authors: Tessa K. Novick, MD, MSW (1); Aditya Surapaneni, PhD (2); Jung-Im Shin, MD, PhD (2), G. Caleb Alexander, MD, MS (4); Lesley A. Inker, MD, MS (5); Eric A. Wright, PharmD, MPH (3); Alex R. Chang, MD, MS (3); Morgan E. Grams, MD, PhD (1)

#### Affiliations:

- (1) Johns Hopkins University Department of Internal Medicine, Division of Nephrology, Baltimore, Maryland
- (2) Welch Center for Prevention, Epidemiology and Clinical Research, Johns Hopkins University, Baltimore, Maryland
- (3) Division of Nephrology, Geisinger Health System, Danville, Pennsylvania
- (4) Johns Hopkins University Bloomberg School of Public Health, Department of Epidemiology
- (5) Tufts Medical Center, Department of Internal Medicine, Division of Nephrology, Boston, Massachusetts

#### Corresponding Author

Morgan E. Grams

Address: 1830 E. Monument St, 4th Floor, Suite 416, Baltimore, MD 21287

Phone/Fax: 410-955-5268/410-367-2258

Email address: mgrams2@jhmi.edu

#### **Supplemental Material Table of Contents**

|                                                                                                        |         |
|--------------------------------------------------------------------------------------------------------|---------|
| Supplemental Table 1. ICD Codes                                                                        | Page 2  |
| Supplemental Table 2. Population Characteristics for Opioids versus Gabapentinoids Analysis            | Page 3  |
| Supplemental Figure 1. Propensity-matching for Opioid versus NSAIDs Analysis                           | Page 4  |
| Supplemental Figure 2. Distribution of Propensity Scores for Opioid Prescription                       | Page 5  |
| Supplemental Figure 3. Sensitivity Analysis Study Population: Opioids versus Gabapentinoids            | Page 6  |
| Supplemental Figure 4. Propensity-matching for Opioid versus Gabapentinoid Analysis                    | Page 7  |
| Supplemental Figure 5. Sensitivity Analysis: Opioids versus NSAIDs using Initial Prescription and eGFR | Page 8  |
| Supplemental Figure 6. Sensitivity Analysis: Fully Adjusted Opioids versus NSAIDs                      | Page 9  |
| Supplemental Figure 7. Sensitivity Analysis: Competing Risk Analysis for Hospitalizations              | Page 10 |
| Supplemental Figure 8. Sensitivity Analysis: Risk of Hospitalization Censoring on Last Clinic Visit    | Page 11 |

*Supplemental material is neither peer-reviewed nor thoroughly edited by CJASN. The authors alone are responsible for the accuracy and presentation of the material.*

**Supplemental Table 1. ICD Codes.**

| <b>Outcome/Covariate</b>    | <b>ICD codes</b>                                                                                                          |
|-----------------------------|---------------------------------------------------------------------------------------------------------------------------|
| Non-pathologic Fracture     | 733.0x, M81.x                                                                                                             |
| Overdose                    | 965.0x, E850.1, E850.2, E950.0, E980.0                                                                                    |
| Incident Diabetes Mellitus  | 250, E10, E11, E13                                                                                                        |
| Coronary Artery Disease     | 410, I21, I22, 36.1, 0210, 0211, 0212, 0213                                                                               |
| Cardiovascular Disease      | 428, I50                                                                                                                  |
| Peripheral Arterial Disease | 440.x, 443.9, 38.18, 39.50, 39.2x, 84.1, I70.2, I70.92, I73.9, 031x                                                       |
| Major Depressive Disorder   | 293.83, 296.x, 298.0, 300.4, 301.1x, 307.44, 309, 311, F06.30, F32, F33, F31.x, F34.x, F51.1x, F43.2, F93.0, F94.8, F43.8 |
| Osteoporosis                | 733.0, M81                                                                                                                |

Supplemental material is neither peer-reviewed nor thoroughly edited by CJASN. The authors alone are responsible for the accuracy and presentation of the material.

**Supplemental Table 2. Population Characteristics at the Time of First Prescription for Opioids versus Gabapentinoids Analysis (Before and After Propensity-Matching).**

| Covariables                                          | Before Propensity-Matching |                                  |                              | After Propensity-Matching |                                  |                              |
|------------------------------------------------------|----------------------------|----------------------------------|------------------------------|---------------------------|----------------------------------|------------------------------|
|                                                      | People Prescribed Opioids  | People Prescribed Gabapentinoids | Standardized Mean Difference | People Prescribed Opioids | People Prescribed Gabapentinoids | Standardized Mean Difference |
|                                                      | N = 53,351                 | N = 6,089                        |                              | N = 7,512                 | N = 3,756                        |                              |
| Age, mean (SD)                                       | 55 (17)                    | 56 (16)                          | -7                           | 54 (16)                   | 55 (16)                          | -5                           |
| Female, N (%)                                        | 30,023 (56%)               | 3535 (58%)                       | -4                           | 4403 (59%)                | 2230 (59%)                       | -2                           |
| Black race, N (%)                                    | 1582 (3%)                  | 208 (3%)                         | -3                           | 100 (1%)                  | 50 (1%)                          | 0                            |
| Baseline eGFR, ml/min/1.73m <sup>2</sup> , mean (SD) | 87.5 (23.9)                | 86.2 (23.0)                      | 6                            | 89.9 (20.4)               | 89.3 (19.7)                      | 3                            |
| Body mass index, kg/m <sup>2</sup> , mean (SD)       | 31.2 (7.8)                 | 31.2 (7.6)                       | 1                            | 31.0 (7.5)                | 31.0 (7.4)                       | 0                            |
| Systolic blood pressure, mmHg, mean (SD)             | 127.3 (17.7)               | 125.3 (16.7)                     | 11                           | 125.7 (16.6)              | 125.9 (16.4)                     | -1                           |
| Total cholesterol, mmol/L, mean (SD)                 | 185.2 (40.9)               | 187.1 (43.7)                     | -4                           | 187.4 (31.8)              | 186.6 (32.8)                     | 2                            |
| Random glucose, mmol/L, mean (SD)                    | 105.8 (32.6)               | 113.3 (41.9)                     | -20                          | 105.5 (31.0)              | 105.3 (29.8)                     | 1                            |
| Alcohol consumption, N (%)                           | 22,881 (47%)               | 2352 (43%)                       | 8                            | 3559 (47%)                | 1761 (47%)                       | 1                            |
| Current cigarette use, N (%)                         | 11,244 (21%)               | 1572 (26%)                       | -11                          | 1836 (24%)                | 873 (23%)                        | 3                            |
| Former cigarette use, N (%)                          | 16,239 (30%)               | 1716 (28%)                       | 5                            | 2271 (30%)                | 1128 (30%)                       | 0                            |
| Antihypertensive prescription, N (%)                 | 27,335 (51%)               | 3459 (57%)                       | -11                          | 3848 (51%)                | 1920 (51%)                       | 0                            |
| Antidyslipidemic prescription, N (%)                 | 19,332 (36%)               | 2617 (43%)                       | -14                          | 2810 (37%)                | 1391 (37%)                       | 1                            |
| Antidiabetic prescription, N (%)                     | 9240 (17%)                 | 1737 (29%)                       | -27                          | 1292 (17%)                | 652 (17%)                        | 0                            |
| Coronary artery disease, N (%)                       | 6813 (13%)                 | 671 (11%)                        | 5                            | 793 (11%)                 | 404 (11%)                        | -1                           |
| Congestive heart failure, N (%)                      | 1882 (4%)                  | 132 (2%)                         | 8                            | 145 (2%)                  | 57 (2%)                          | 3                            |
| Cardiovascular disease, N (%)                        | 3171 (6%)                  | 340 (6%)                         | 2                            | 1228 (16%)                | 595 (16%)                        | 1                            |
| Peripheral artery disease, N (%)                     | 1370 (3%)                  | 188 (3%)                         | -3                           | 194 (3%)                  | 83 (2%)                          | 2                            |
| Major Depressive Disorder, N (%)                     | 9319 (17%)                 | 1143 (19%)                       | -3                           | 1422 (19%)                | 664 (18%)                        | 3                            |
| Diabetes, N (%)                                      | 5225 (10%)                 | 756 (12%)                        | -8                           | 721 (10%)                 | 365 (10%)                        | 0                            |
| Hypertension, N (%)                                  | 14,376 (27%)               | 1529 (25%)                       | 4                            | 1904 (25%)                | 970 (26%)                        | -1                           |
| Osteoporosis, N (%)                                  | 3508 (7%)                  | 362 (6%)                         | 3                            | 468 (6%)                  | 247 (7%)                         | -1                           |
| Myalgias, N (%)                                      | 3593 (7%)                  | 585 (10%)                        | -11                          | 412 (5%)                  | 206 (5%)                         | 0                            |
| Amputations, N (%)                                   | 84 (0%)                    | 8 (0%)                           | 1                            | 7 (0%)                    | 2 (0%)                           | 1                            |

Abbreviations: eGFR - estimated glomerular filtration rate; % reflect column-wise percentages

Supplemental material is neither peer-reviewed nor thoroughly edited by CJASN. The authors alone are responsible for the accuracy and presentation of the material.

**Supplemental Figure 1. Propensity-matching for Opioid versus NSAIDs Analysis.** Before propensity matching, the median (IQR) propensity score for opioids and NSAIDs were 0.72 [0.63-0.80] and 0.34 [0.28-0.39], respectively. After propensity matching, the median (IQR) propensity score for opioids and NSAIDs were 0.45 [0.38-0.53] and 0.45 [0.38-0.53], respectively. Values <10% indicate a negligible difference between groups.

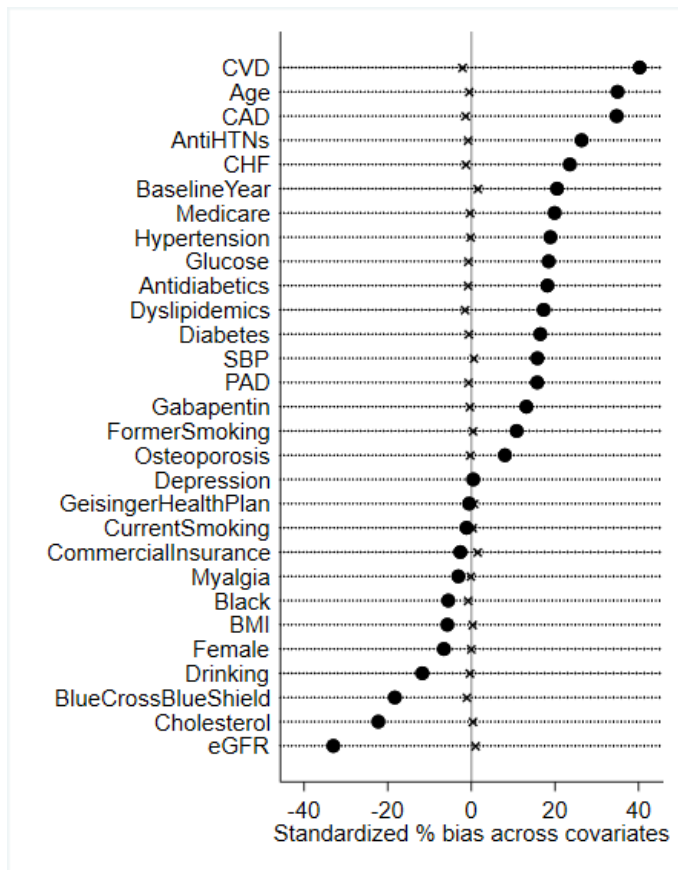

Supplemental material is neither peer-reviewed nor thoroughly edited by CJASN. The authors alone are responsible for the accuracy and presentation of the material.

**Supplemental Figure 2. Distribution of Propensity Scores for Opioid Prescription in the Opioid versus NSAID Analysis (Before and After Matching).**

A)

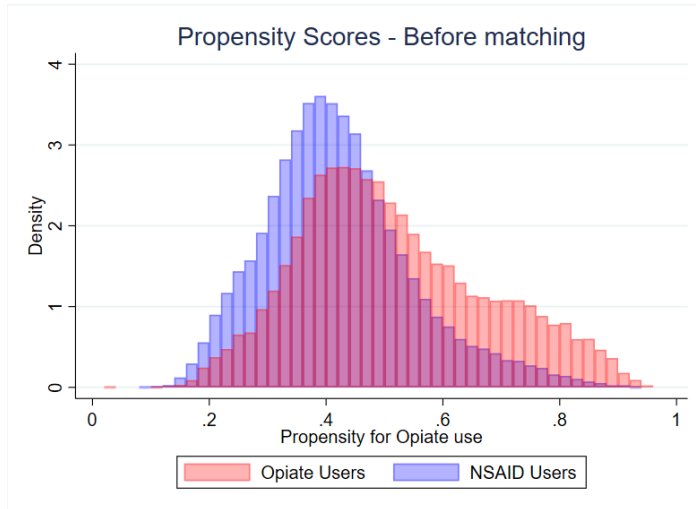

B)

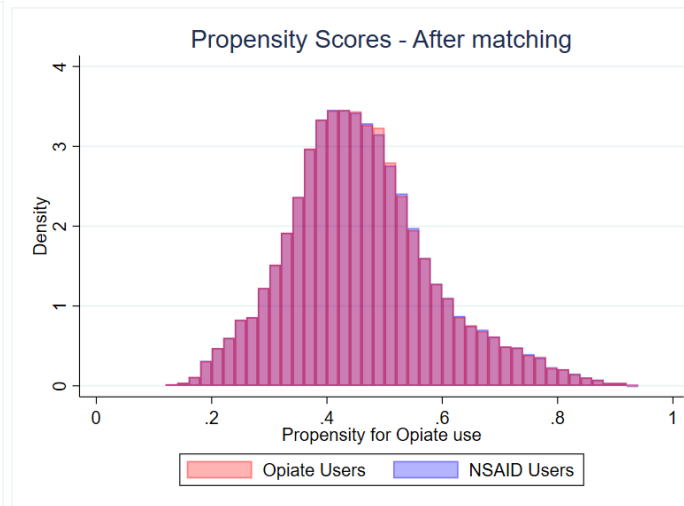

Supplemental material is neither peer-reviewed nor thoroughly edited by CJASN. The authors alone are responsible for the accuracy and presentation of the material.

### Supplemental Figure 3. Sensitivity Analysis Study Population: Opioids versus Gabapentinoids.

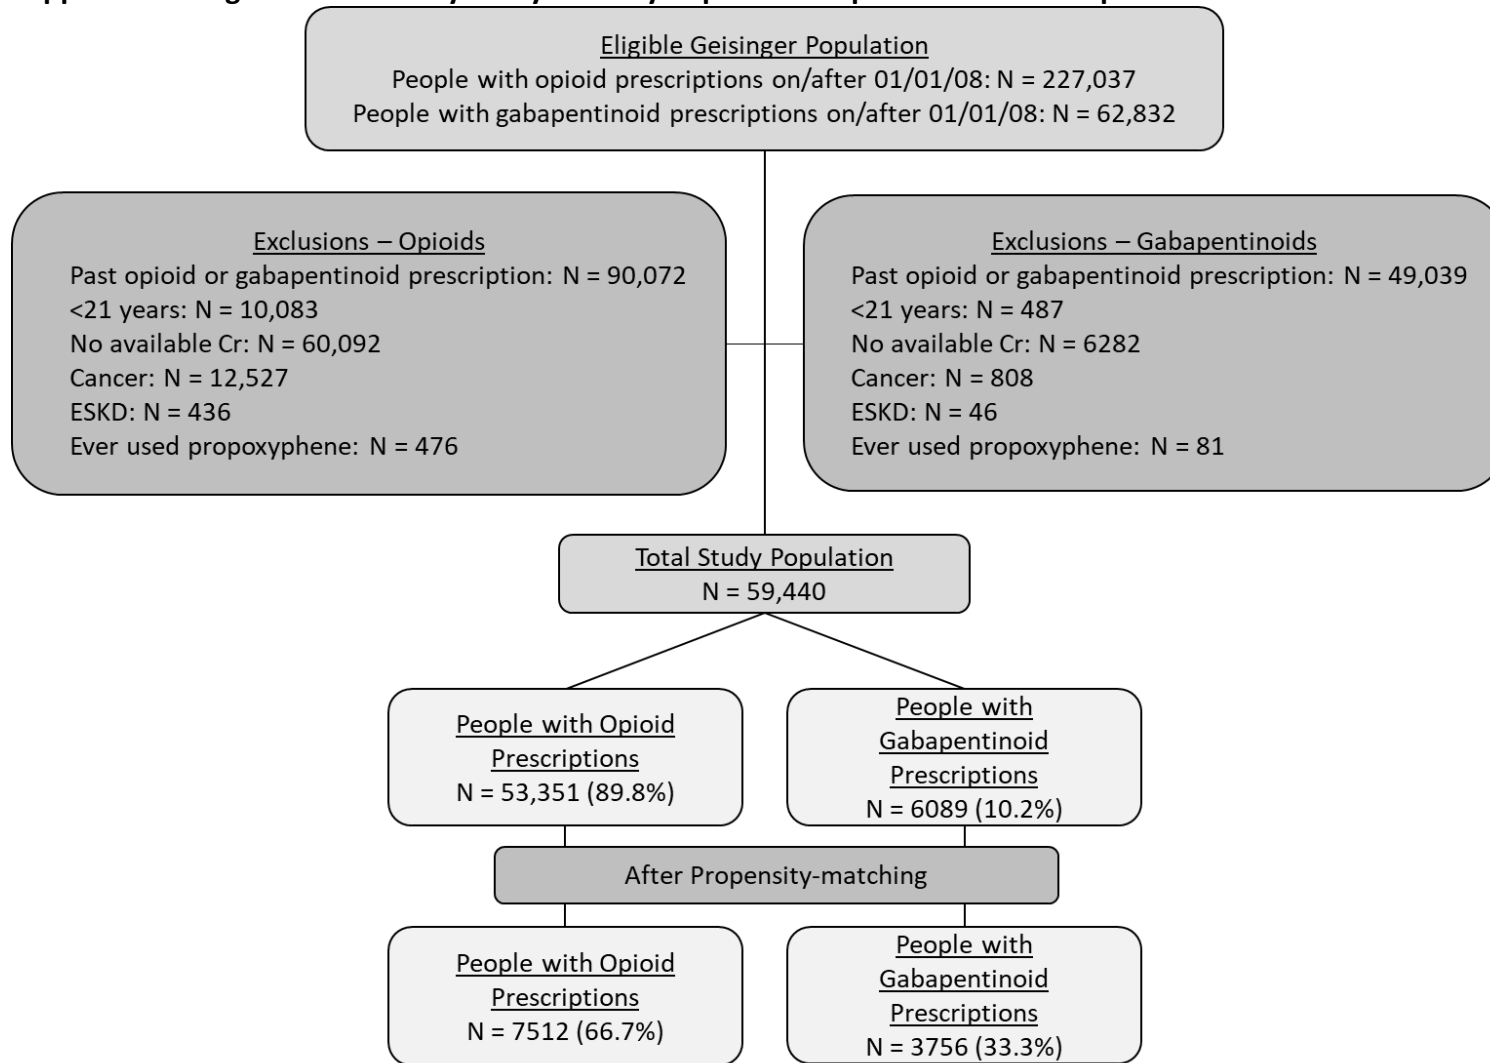

Abbreviations: Cr – creatinine, ESKD – end stage kidney disease

2:1 Matching was used because of the relatively few numbers of patients receiving gabapentinoids.

Supplemental material is neither peer-reviewed nor thoroughly edited by CJASN. The authors alone are responsible for the accuracy and presentation of the material.

**Supplemental Figure 4. Propensity-matching for Opioid versus Gabapentinoid Analysis.** Before propensity matching, the median (IQR) propensity score for opioids and gabapentinoids were 0.90 [0.88-0.92] and 0.84 [0.79-0.89], respectively. After propensity matching, the median (IQR) propensity score for opioids and gabapentinoids were 0.90 [0.88-0.92] and 0.90 [0.88-0.92], respectively. Values <10% indicate a negligible difference between groups.

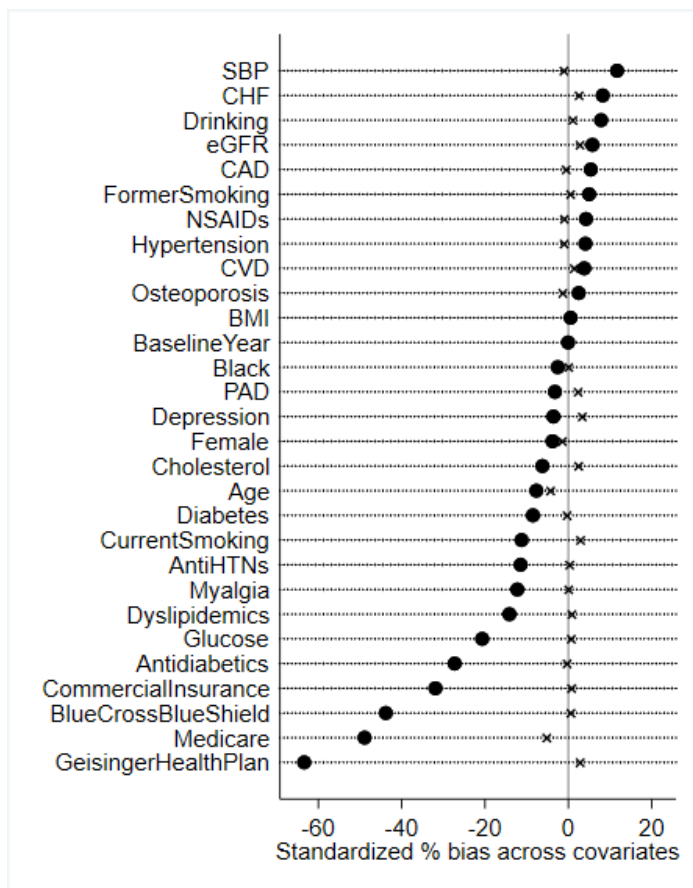

Supplemental material is neither peer-reviewed nor thoroughly edited by CJASN. The authors alone are responsible for the accuracy and presentation of the material.

**Supplemental Figure 5. Sensitivity Analysis: Using Initial Prescription Status and eGFR.** A) Adjusted hazard ratios for death and B) hospitalization in those with opioids prescriptions (red line), and NSAID prescriptions (blue line) compared to a reference group of individuals with an NSAID prescription and eGFR 80 ml/min/1.73m<sup>2</sup>.

A)

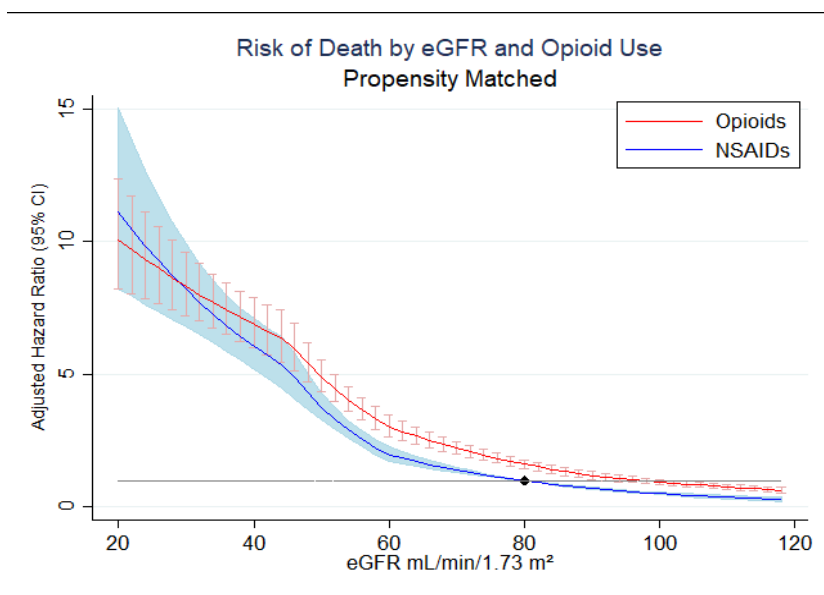

B)

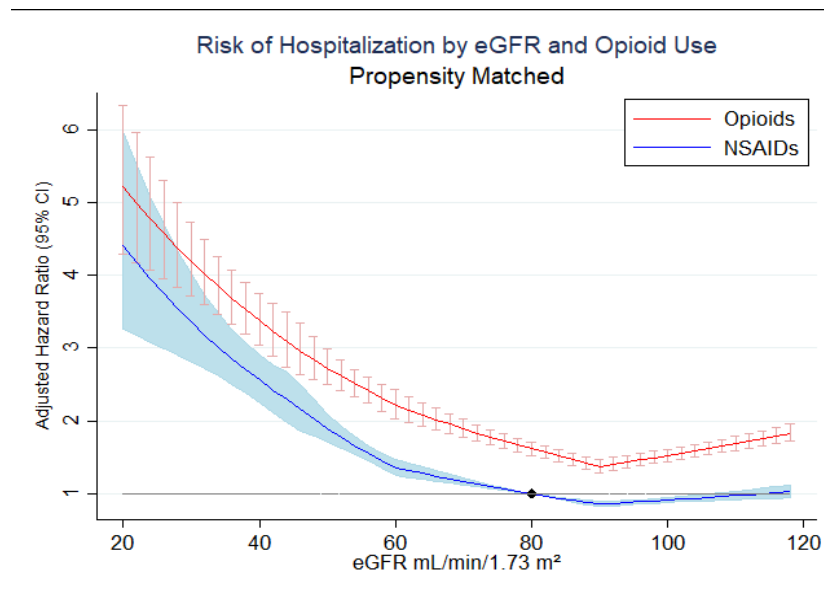

Abbreviations: eGFR - estimated glomerular filtration rate



Supplemental material is neither peer-reviewed nor thoroughly edited by CJASN. The authors alone are responsible for the accuracy and presentation of the material.

**Supplemental Figure 6. Sensitivity Analysis: Fully Adjusted Opioids versus NSAIDs.** A) Adjusted hazard ratios for death and B) hospitalization in those with  $\geq 60$  oral morphine milligram equivalents (MME) (red line), 1-59 MMEs (blue line), and NSAID prescriptions (black line) compared to a reference group of individuals with an NSAID prescription and eGFR 80 ml/min/1.73m<sup>2</sup>.

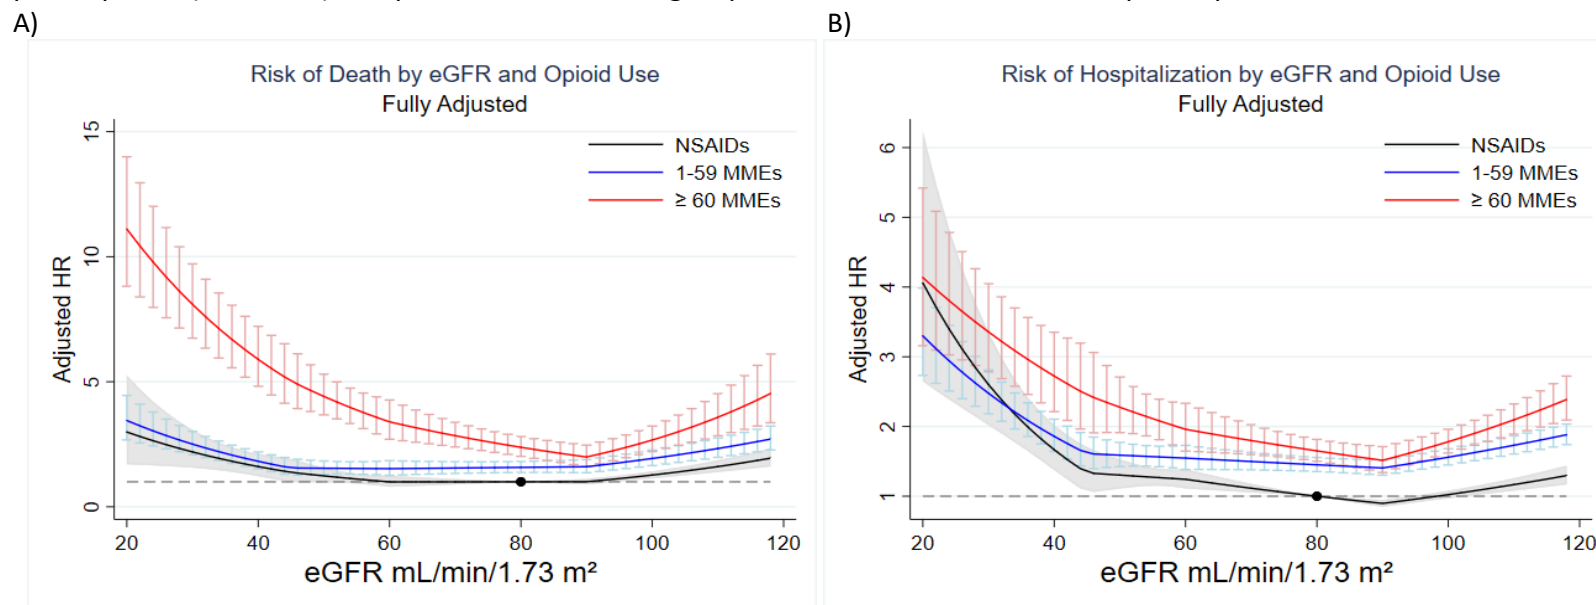

Abbreviations: eGFR - estimated glomerular filtration rate

Supplemental material is neither peer-reviewed nor thoroughly edited by CJASN. The authors alone are responsible for the accuracy and presentation of the material.

**Supplemental Figure 7. Sensitivity Analysis: Competing Risk Analysis for Hospitalizations.** Adjusted hazard ratios for hospitalization in those with  $\geq 60$  mg oral morphine equivalents (red line), 1-59 mg oral morphine equivalents (blue line), and NSAID prescriptions (black line) compared to a reference group of individuals with an NSAID prescription and eGFR 80 ml/min/1.73m<sup>2</sup>.

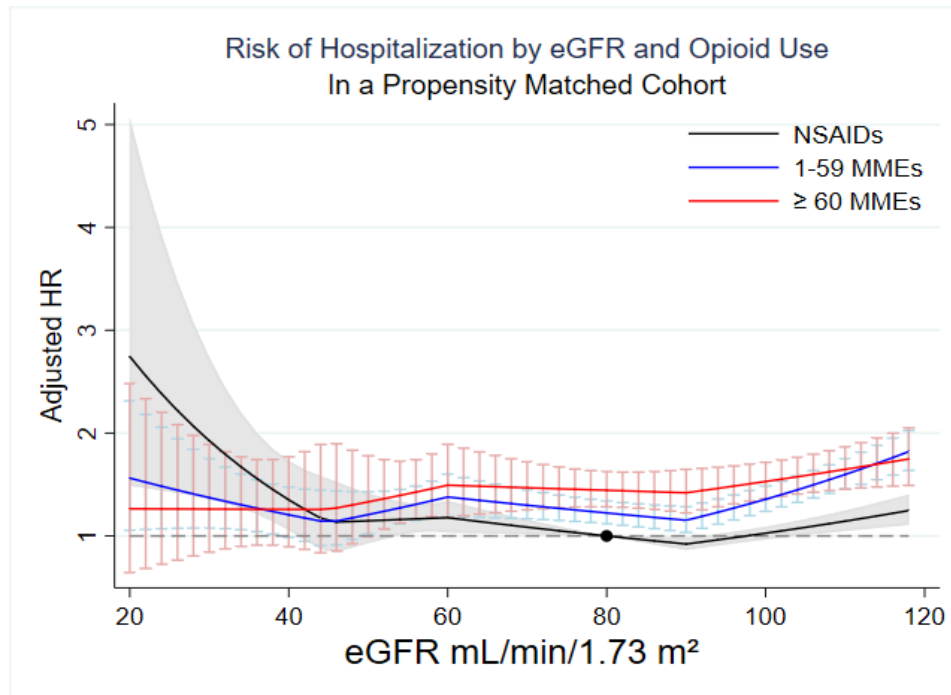

Abbreviations: eGFR - estimated glomerular filtration rate

Supplemental material is neither peer-reviewed nor thoroughly edited by CJASN. The authors alone are responsible for the accuracy and presentation of the material.

**Supplemental Figure 8. Sensitivity Analysis: Risk of Hospitalization Censoring on Last Clinic Visit.** A) Adjusted hazard ratios for hospitalization in those with  $\geq 60$  oral morphine milligram equivalents (MMEs) (red line), 1-59 MMEs (blue line), and NSAID prescriptions (black line) compared to a reference group of individuals with an NSAID prescription and eGFR 80 ml/min/1.73m<sup>2</sup>. B) Adjusted hazard ratios for hospitalization in those with  $\geq 60$  oral morphine milligram equivalents (MMEs) (red line), 1-59 MMEs (blue line), and gabapentinoid prescriptions (black line) compared to a reference group of individuals with a gabapentinoid prescription and eGFR 80 ml/min/1.73m<sup>2</sup>.

A)

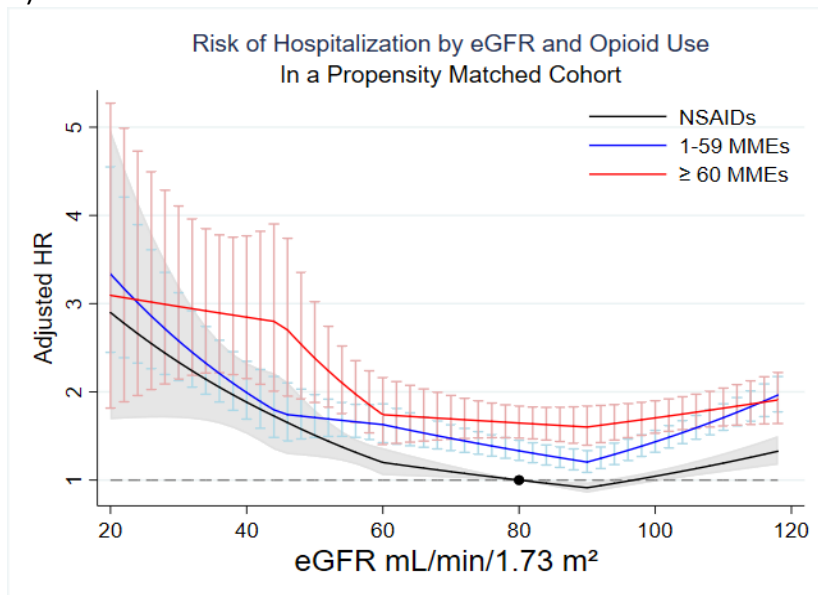

B)

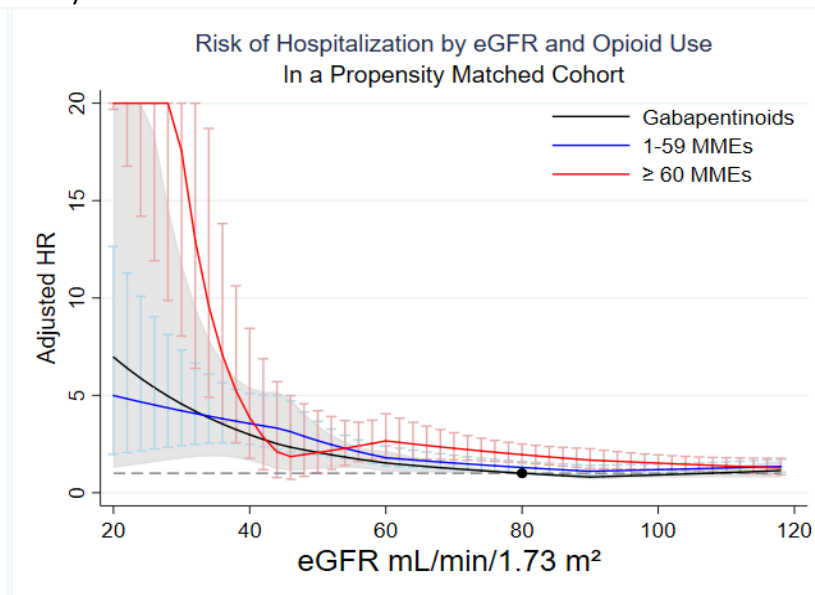

Supplement: CJN.00440119SupplementaryData.pdf [file CJN.00440119SupplementaryData.pdf]
